# Supplementary material for: Pressure dependent surface morphology and Raman studies of semicrystalline poly(indole-5-carboxylic acid) by the Langmuir–Blodgett technique
Source: Royal Society of Chemistry journal article supplement (doi:10.1039/c3ra41895b), 2013-01-01
Supplement: c3ra41895b.pdf [file c3ra41895b.pdf]

## Supplementary Information

### S1: FAB mass spectroscopy

FAB mass spectroscopy in chloroform for electrochemically synthesized 5CPIIn sample (only soluble form) used in the study. The recorded data is given in the following Figure 1.

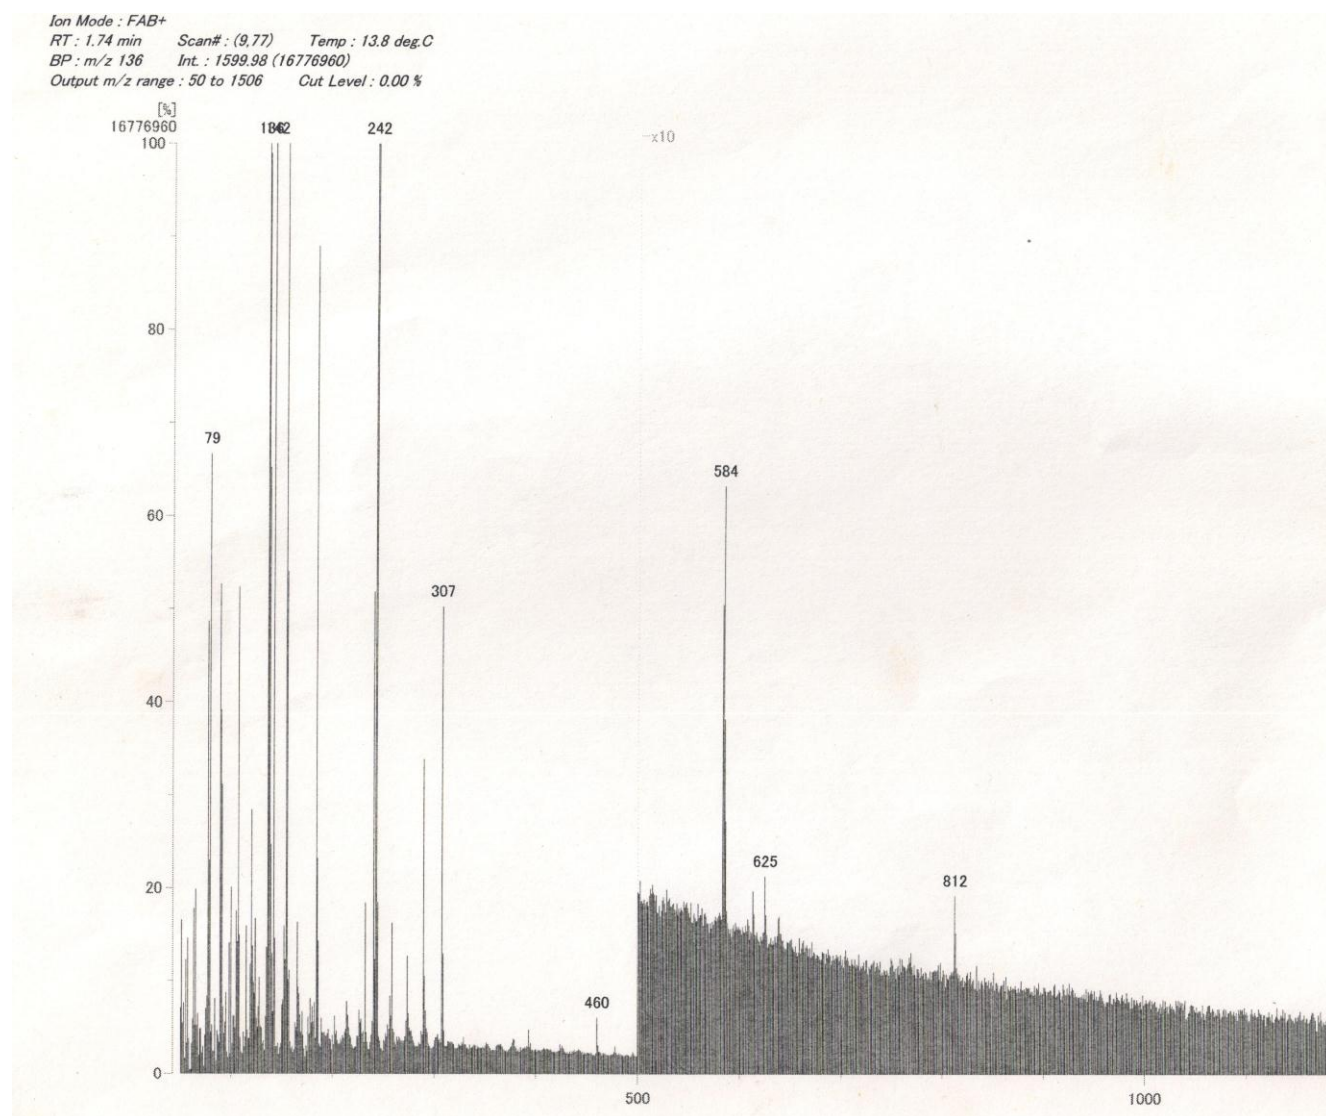

## S2: FT-IR spectra

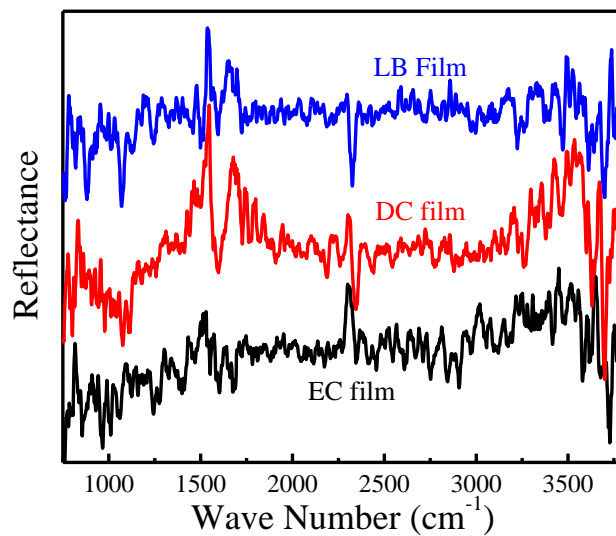

Figure 2. FTIR spectra of electropolymerized (EP) film, Drop cast (DC) film and Langmuir Blodgett (LB) film respectively

The FTIR spectra recorded for EC film, DC film and LB films are founded almost same.
